# Supplementary material for: Emerging roles of extracellular vesicles in oral and maxillofacial areas
Source: Springer Nature journal article supplement (doi:10.1038/s41368-024-00341-9), 2025-02-03
Supplement: MOESM1 [file 41368_2024_341_MOESM1_ESM.pdf]

Supplementary Table 1. Summary of the biological functions of EVs from different sources via diverse cargos

| Type of EVs                 |                                                   | Contents of EVs                              | Biological effects                                                              | References |
|-----------------------------|---------------------------------------------------|----------------------------------------------|---------------------------------------------------------------------------------|------------|
| Epithelial cell-derived EVs | Oral epithelial                                   | miR-135a                                     | Promote tooth tissue development                                                | 6          |
|                             | cell-derived EVs                                  | miR-30a, miR-200 family members              | Promote EBV reactivation in B cells and EV71 replication during virus infection | 22-24      |
|                             | Hertwig's epithelial root sheath cell-derived EVs | /                                            | Promote the regeneration of dentin-pulp tissue                                  | 19         |
|                             | Oral mucosal epithelial cells sheets-derived EVs  | /                                            | Promote wound healing                                                           | 20         |
|                             | SGEC-derived EVs                                  | autoantigens Ro/SSA, La/SSB, Sm              | Regulate immunologic reactions                                                  | 21         |
| Immune cell-derived EVs     | Macrophage-derived EVs                            | miR-378a, IL-10 mRNA, miR-21a-5p, miR-483-5p | Regulate osteogenic differentiation                                             | 35-38,40   |
|                             |                                                   | miR-31-5p, lncRNA LBX1-AS1                   | Pose a two-sided effect on tumor progression                                    | 45-47      |
| EVs                         | B cell-derived EVs                                | EBV-miR-BART13-3p                            | Impaire glandular cell function in SS                                           | 28         |

|                          |                            |                                                                                |                                                                                                     |                |
|--------------------------|----------------------------|--------------------------------------------------------------------------------|-----------------------------------------------------------------------------------------------------|----------------|
| <b>Tumor-derived EVs</b> | T cell-derived EVs         | miR-142-3p                                                                     | Impaire glandular cell function in SS                                                               | 29             |
|                          |                            | interleukin-7, -10, -12, -17, interleukin-1 $\beta$ , -5, interferon- $\gamma$ | Drive the trafficking of CD8+ T cells and induce keratinocytes apoptosis to promote OLP progression | 30-31          |
|                          | Dendritic cell-derived EVs | SASP                                                                           | Promote and amplify senescence in normal bystander dendritic cells and T cells                      | 25-27          |
|                          |                            | MHC II                                                                         | Suppress inflammation and collagen-induced arthritis                                                | 32             |
|                          |                            | /                                                                              | Inhibit tumor progression                                                                           | 44             |
|                          | OSCC cell-derived EVs      | miR-142-3p, miR-1246, miR-200c-3p, EGFR, HSP90, miR-21, LOXL2                  | Promote OSCC cells proliferation, migration and invasion                                            | 8,48-54        |
|                          |                            | miR-210-3p, miR-221, miR-142-3p, miR-130b-3p, miR-23b-3p, EPHB2, adenosine     | Promote angiogenesis                                                                                | 10,60-63,69-70 |
|                          |                            | miR-29a-3p, CMTM6, THBS1, miR-9, PD-L1,                                        | Regulate tumor immunology by reprogramming                                                          | 9,77-80,82-84  |

|                       |                                                                                     |                                                            |                |
|-----------------------|-------------------------------------------------------------------------------------|------------------------------------------------------------|----------------|
|                       | galectin-1, NAP1                                                                    | immune cells                                               |                |
|                       | miR-192/215, TGFβ1                                                                  | Promote the activation of CAFs                             | 10,88-90       |
|                       | miR-21, miR-503-3p, miR-155, miR-30a                                                | Enhance OSCC cisplatin resistance and<br>radioresistance   | 102,104-108    |
| NPC cell-derived EVs  | MMP13, EGFR, HMGA2                                                                  | Promote NPC cells proliferation, migration and<br>invasion | 56-59          |
|                       | miR-205-5p, miR-17-5p, miR-9, miR-144, miR-23a,<br>angiogenic proteins, HAX1, HMGB3 | Promote angiogenesis                                       | 64-68,71,73,75 |
|                       | CCL20                                                                               | Regulate tumor immunology                                  | 85             |
|                       | LMP1                                                                                | Promote the activation of CAFs                             | 91             |
|                       | miR-106a-5p                                                                         | Enhance NPC cisplatin resistance and<br>radioresistance    | 103            |
| SACC cell-derived EVs | /                                                                                   | Promote SACC cells migration and invasion                  | 55             |

|                        |                   |                                                                                         |                                                                                         |                          |
|------------------------|-------------------|-----------------------------------------------------------------------------------------|-----------------------------------------------------------------------------------------|--------------------------|
| <b>MSC-derived EVs</b> | CAF-derived EVs   | proinflammatory cytokines, nerve growth factor                                          | Educate human periodontal ligament fibroblast cells toward the protumorigenic phenotype | 92                       |
|                        |                   | MFAP5, ITGB1, BMI1, miR-34a-5p, miR-382-5p, miR-146b-5p, miR-3188, miR-196a, miR-876-3p | Promote the proliferation and migration of OSCC cells                                   | 93-101                   |
|                        | BMSC-derived EVs  | anti-inflammatory miRNAs, VEGF, miR-29a, miR-210-3p                                     | Promote bone regeneration                                                               | 120-121,123-124, 125-128 |
|                        |                   | miR-326                                                                                 | Promote cartilage regeneration                                                          | 129-130,134              |
|                        |                   | miR-1246, lncRNA HCP5, miR-223-3p                                                       | Promote periodontal tissue regeneration                                                 | 156-159,176-177          |
|                        |                   | miR-223, VEGF-A, FGF-2, HGF, PDGF-BB                                                    | Promote skin wound healing                                                              | 183,185                  |
|                        |                   | miR-101-3p                                                                              | Inhibit OSCC progression                                                                | 180                      |
|                        | UCMSC-derived EVs | VEGF-A, FGF-2, HGF, PDGF-BB, miR-21-5p, miR-125b-5p, Ang-2                              | Promote skin wound healing                                                              | 186-189                  |
|                        |                   |                                                                                         |                                                                                         |                          |
|                        | ADSC-derived EVs  | VEGF-A, FGF-2, HGF, PDGF-BB                                                             | Promote skin wound healing                                                              | 186                      |

|                  |                                                                                                   |                                         |                  |
|------------------|---------------------------------------------------------------------------------------------------|-----------------------------------------|------------------|
| DPSC-derived EVs | miR-451a                                                                                          | Promote bone regeneration               | 122              |
|                  | /                                                                                                 | Promote bone regeneration               | 116-117          |
|                  | miR-140-5p                                                                                        | Promote cartilage regeneration          | 131-132          |
|                  | miR-150, miR-125a-3p, miR-146a-5p, miR-2110,                                                      | Promote pulp regeneration               | 17,140-141,143,1 |
|                  | miR-200b-3p, miR-223-3p, miR-1246, miR-494-3p,<br>LOXL2                                           |                                         | 46,148-150       |
| SHED-derived EVs | miR-378a                                                                                          | Promote periodontal tissue regeneration | 170              |
|                  | /                                                                                                 | Promote skin wound healing              | 190              |
|                  | mitochondrial transcription factor A mRNA                                                         | Promote bone regeneration               | 118              |
|                  | miR-100-5p                                                                                        | Prevent TMJOA                           | 135              |
|                  | miR-582-3p, miR-3622a-3p, miR-4657, miR-147b,<br>miR-152-5p, miR-3152-3p, miR-7-1-3p, Wnt3a, BMP2 | Promote periodontal tissue regeneration | 166-169          |
|                  | miR-100-5p, miR-1246                                                                              | Inhibit OSCC progression                | 182              |

|                                       |                   |                                                                                                                                                                                                                                                                         |                                                                                                                        |                                       |
|---------------------------------------|-------------------|-------------------------------------------------------------------------------------------------------------------------------------------------------------------------------------------------------------------------------------------------------------------------|------------------------------------------------------------------------------------------------------------------------|---------------------------------------|
| <b>Body<br/>fluid-derived<br/>EVs</b> | PDLSC-derived EVs | miR-590-3p, miR-155-5p                                                                                                                                                                                                                                                  | Promote periodontal tissue regeneration                                                                                | 164-165,173-174                       |
|                                       | SCAP-derived EVs  | /                                                                                                                                                                                                                                                                       | Promote pulp regeneration                                                                                              | 142,147                               |
|                                       |                   | Cdc42                                                                                                                                                                                                                                                                   | Promote tissue regeneration of palatal gingival<br>complex critical-size defects                                       | 178                                   |
|                                       | GMSC-derived EVs  | miR-1260b                                                                                                                                                                                                                                                               | Promote periodontal tissue regeneration                                                                                | 160-163                               |
|                                       |                   | IL-1RA                                                                                                                                                                                                                                                                  | Promote gingival wound healing                                                                                         | 179                                   |
|                                       |                   | /                                                                                                                                                                                                                                                                       | Promote taste bud regeneration                                                                                         | 192                                   |
|                                       | Salivary EVs      | miR-24-3p, miR-512-3p, miR-412-3p, miR-302b-3p,<br>miR-517b-3p, miR-140-5p, miR-143-5p, miR-145-5p,<br>miR-10b-5p, miR-486-5p, miR-200a, Alix<br>miR-125a-3p, miR-223-3p, miR-140-5p, miR-146a-5p,<br>miR-628-5p, global 5mC hypermethylation, PD-L1<br>mRNA, CD9, CD81 | Serve as biomarkers for the diagnosis of OSCC<br><br><br><br>Serve as biomarkers for the diagnosis of<br>periodontitis | 195-198,202<br><br><br><br>15,208-212 |
|                                       |                   |                                                                                                                                                                                                                                                                         |                                                                                                                        |                                       |
|                                       |                   |                                                                                                                                                                                                                                                                         |                                                                                                                        |                                       |
|                                       |                   |                                                                                                                                                                                                                                                                         |                                                                                                                        |                                       |

|                                          |                                                                                     |                                                        |         |
|------------------------------------------|-------------------------------------------------------------------------------------|--------------------------------------------------------|---------|
|                                          | miR-4484                                                                            | Serve as biomarkers for the diagnosis of OLP           | 14      |
|                                          | miR-1307-5p                                                                         | Serve as biomarkers for the prognosis of OSCC          | 220     |
| Serum EVs                                | miR-130a, Alix, PD-L1 mRNA                                                          | Serve as biomarkers for the diagnosis of OSCC          | 199-204 |
|                                          | miR-let-7d, miR-126-3p, miR-199a-3p, miR-1304-3p, miR-200c-3p, SNORD57, SNODB1771   | Serve as biomarkers for the diagnosis of periodontitis | 208,213 |
|                                          | circ-IQGAP2, circ-ZC3H6, miR-127-3p, miR-541-3p, miR-409-3p, miR-410-3p, miR-329-5p | Serve as biomarkers for the diagnosis of SS            | 218-219 |
|                                          | miR-126, miR-130a                                                                   | Serve as biomarkers for the prognosis of OSCC          | 221,199 |
| Postoperative drainage fluid-derived EVs | EHD2, CAVIN1                                                                        | Serve as biomarkers for the prognosis of OSCC          | 206     |
| GCF-derived EVs                          | /                                                                                   | Serve as biomarkers for the diagnosis of periodontitis | 215     |
| PICF-derived EVs                         | miR-21-3p, miR-150-5p                                                               | Serve as biomarkers for the diagnosis of               | 216     |

|                    |                                |                                               |                                                           |     |
|--------------------|--------------------------------|-----------------------------------------------|-----------------------------------------------------------|-----|
|                    |                                |                                               | peri-implantitis                                          |     |
|                    | OKC fluid-derived EVs          | /                                             | Serve as biomarkers for the progression monitoring of OKC | 207 |
| <b>Tissue</b>      | OLP/OLL-derived EVs            | protein disulfide isomerase family A member 3 | Promote the development of OLP and OLL                    | 224 |
| <b>derived-EVs</b> | Dental pulp tissue-derived EVs | /                                             | Promote pulp regeneration                                 | 225 |

---

EVs extracellular vesicles, EBV Epstein-Barr virus, EV71 Enterovirus 71, SGEC salivary gland epithelial cell, SS Sjögren’s syndrome, OLP oral lichen planus, SASP senescence associated secretory phenotype, OSCC oral squamous cell carcinoma, CAF cancer associated-fibroblast, NPC nasopharyngeal cancer, SACC salivary adenoid cystic carcinoma, BMSC bone marrow mesenchymal stem cell, UCMSC umbilical cord mesenchymal stem cell, ADSC adipose-derived mesenchymal stem cell, DPSC dental pulp stem cell, SHED stem cell from exfoliated deciduous teeth, TMJOA Temporomandibular joint osteoarthritis, PDLSC periodontal ligament stem cell, SCAP stem cell from apical papilla, GMSC gingival mesenchymal stem cell, GCF gingival crevicular fluid, PICF peri-implant crevicular fluid, OKC odontogenic keratocyst, OLL oral lichenoid lesions



Supplementary Table 2. Three strategies for the preparation of artificial exosomes

| Artificial exosomes | Cells or materials         | Preparation strategy                                                                           | Yield    | Potential application                                             | References |
|---------------------|----------------------------|------------------------------------------------------------------------------------------------|----------|-------------------------------------------------------------------|------------|
| Top-down strategies | Monocytes or macrophage    | Serial extrusion through filters with diminishing pore sizes (10, 5, and 1 μm)                 | 100-fold | Deliver chemotherapeutic drug to treat malignant tumors           | 227        |
|                     | Natural killer cell        | Serial extrusion through filters with diminishing pore sizes (5, and 1 μm)                     | 50-fold  | As an immunotherapeutic agent for cancer treatment                | 228        |
|                     | Murine embryonic stem cell | Slicing living cell membrane with microfabricated 500 nm-thick silicon nitride (SixNy) blades. | 100-fold | Exogenous material delivery                                       | 229        |
|                     | Human monocyte             | Sonication                                                                                     | 200-fold | Mitigate the symptoms of outer membrane vesicles-induced systemic | 230        |

|                      |                                              |                                                                         |         |                                                     |         |
|----------------------|----------------------------------------------|-------------------------------------------------------------------------|---------|-----------------------------------------------------|---------|
|                      |                                              |                                                                         |         | inflammatory response syndrome                      |         |
|                      | hUCMSC                                       | Ultrasonication                                                         | 20-fold | Skin regeneration and rejuvenation                  | 231     |
| Bottom-up strategies | /                                            | Liposomes tailored with integrin $\alpha 6 \beta 4$                     | /       | Targeted cancer drug delivery                       | 233     |
|                      | /                                            | Liposomes bind with APO2L, TRAIL                                        | /       | Treat rheumatoid arthritis and haematological tumor | 234-236 |
|                      | /                                            | Liposomes with membrane proteins chimeric modification                  | /       | Targeted hepatocellular carcinoma therapy           | 237     |
|                      | /                                            | Conjugate a CD11c monoclonal antibody to the surface of immunoliposomes | /       | Transdermal delivery of vaccines                    | 238     |
|                      |                                              |                                                                         |         |                                                     |         |
| Biohybrid strategies | Raw264.7 cell-derived exosomes and liposomes | Freeze-thaw technique                                                   | /       | As nanocarriers for drug delivery                   | 239     |

|                                                 |                                              |   |                                              |     |
|-------------------------------------------------|----------------------------------------------|---|----------------------------------------------|-----|
| HEK293FT cell-derived<br>exosomes and liposomes | Direct incubation                            | / | Deliver CRISPR/Cas9 system in MSCs           | 240 |
| HUVEC-derived EVs and<br>liposomes              | PEG-mediated fusion                          | / | Efficient drug loading and delivery          | 241 |
| Macrophage-derived sEVs<br>and liposomes        | Extrusion-based membrane fusion<br>technique | / | Tumor-targeted drug delivery                 | 242 |
| CXCR4+ exosomes and<br>liposomes                | Extrusion                                    | / | As an anabolic therapy for aged bone<br>loss | 243 |

---

EVs extracellular vesicles, MSC mesenchymal stem cell, UCMSC umbilical cord mesenchymal stem cell, HUVEC human umbilical vein endothelial cells

Supplementary Table 3. Strategies for the preparation of engineered exosomes by parental cell modification

| Parent cell<br>modification | Origin of EVs | Modification       | Transfection<br>vectors                                           | Potential application               | References |
|-----------------------------|---------------|--------------------|-------------------------------------------------------------------|-------------------------------------|------------|
| Transfection                | MSC           | yCD::UPRT          | Retrovirus                                                        | Targeted cancer drug delivery       | 244        |
|                             | OSCC cell     | LncRNA ADAMTS9-AS2 | Lentivirus                                                        | Suppress OSCC progression           | 245        |
|                             | OSCC cell     | LncRNA PART1       | Lentivirus                                                        | Suppress OSCC malignant progression | 246        |
|                             | hADSC         | miR-375            | Lentivirus                                                        | Enhance bone regeneration           | 247        |
|                             | BMSC          | BMP2               | Lentiviral particles                                              | Enhance bone regeneration           | 248        |
|                             | 293T/17 cell  | CXCR4 and miR-126  | Lentivirus and<br>RFect<br>siRNA/miRNA<br>Transfection<br>Reagent | Alleviate periodontitis             | 249        |

|                 |               |                                     |            |                                                             |     |
|-----------------|---------------|-------------------------------------|------------|-------------------------------------------------------------|-----|
|                 | HEK293FT cell | NFIC                                | Lentivirus | Treat apical periodontitis and dentin regeneration          | 250 |
|                 | HEK293 cell   | miR-31                              | Lentivirus | Promote diabetic wounds healing                             | 252 |
|                 | MSC           | HOTAIR                              | Plasmids   | Enhance angiogenesis and wound healing                      | 253 |
| Co-culture      | MSC           | Paclitaxel                          | /          | Package and deliver active drugs in cancer                  | 254 |
| Preconditioning | MSC           | yCD : UPRT and iron oxide (Venofer) | /          | Facilitate targeted tumor cell ablation for tumor treatment | 255 |
|                 | BMSC          | miR-21-5p                           | /          | Enhance wound healing                                       | 256 |

EVs extracellular vesicles, MSC mesenchymal stem cell, BMSC bone marrow mesenchymal stem cell, ADSC adipose-derived mesenchymal stem cell, OSCC oral squamous cell carcinoma

Supplementary Table 4. Strategies for the preparation of engineered exosomes by direct exosome modification

| EVs<br>modification | Origin of EVs       | Modification                 | Potential application                                        | References |
|---------------------|---------------------|------------------------------|--------------------------------------------------------------|------------|
| Co-incubation       | HEK293T cell        | Cholesterol-modified miR-34a | Inhibite OSCC cell proliferation,<br>migration, and invasion | 263        |
|                     | HEK293 cell         | exoSTING                     | Promote tumor immune surveillance                            | 264        |
| Sonication          | Regulatory DC       | TGFB1 and IL10               | Treat degenerative alveolar bone disease                     | 265        |
|                     | Monocyte-derived DC | TGFB1 and IL10               | Effective delivery system for immune<br>modulation           | 266        |
|                     | M2 macrophage       | Melatonin                    | Inflammatory periodontal tissue<br>regeneration              | 267        |
|                     | M1 macrophage       | Paclitaxel                   | Enhance the anti-tumor effects of<br>chemotherapeutics       | 268        |

|                        |                               |                                 |                                   |     |
|------------------------|-------------------------------|---------------------------------|-----------------------------------|-----|
| <b>Electroporation</b> | Normal fibroblast transfected | siRNA of lymphocyte cytoplasmic | Attenuate oral cancer progression | 269 |
|                        | with Epstein-Barr Virus       | protein 1                       |                                   |     |
|                        | Induced-3                     |                                 |                                   |     |
|                        | hADSC                         | miR-21-5p                       | Promote diabetic cutaneous wound  | 270 |
|                        |                               |                                 | healing                           |     |

EVs extracellular vesicles, OSCC oral squamous cell carcinoma, DC dendritic cell, ADSC adipose-derived mesenchymal stem cell
